# Supplementary material
Source: Springer Nature journal article supplement (https://www.springermedizin.de/resource/supplementary/13075_2009_2785_MOESM5_ESM.pdf/9692878)

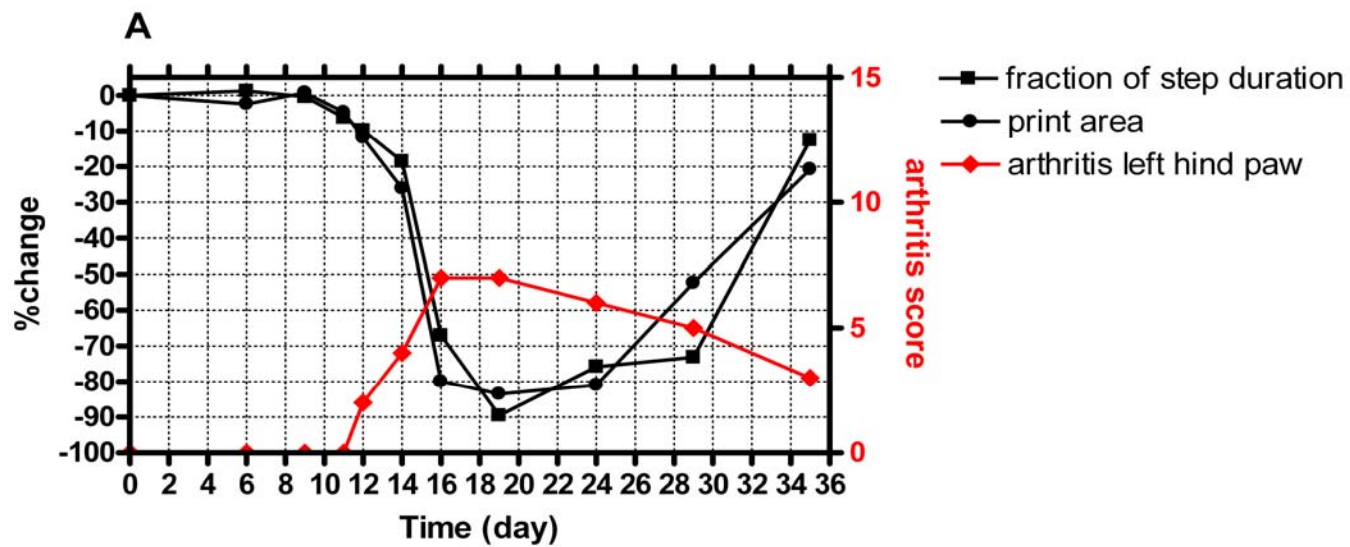

**B**

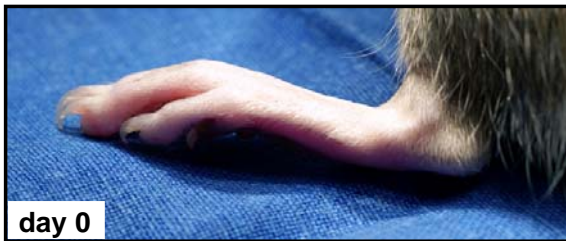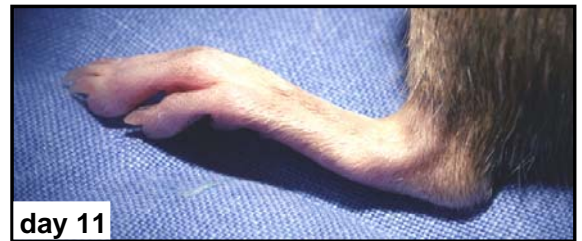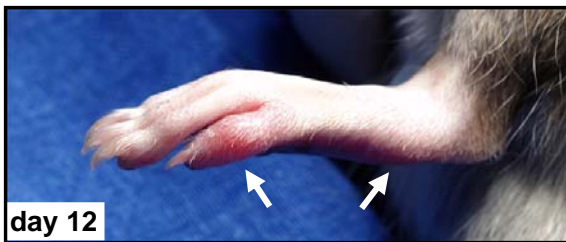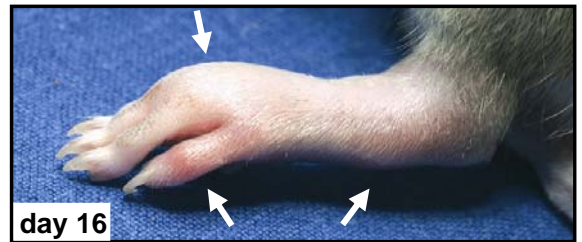

**C**

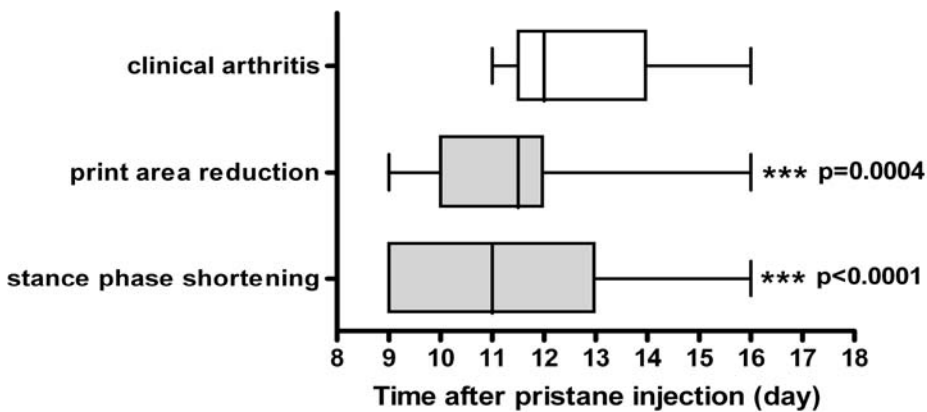

Supplement: MOESM5 [file 9692878]
